# Supplementary material for: Routine, ensemble characterisation of electrophoretic mobility in high and saturated ionic dispersions
Source: PubMed Central journal article supplement (PMC7070055; doi:10.1038/s41598-020-61624-9), 2020-03-13
Supplement: 41598_2020_61624_MOESM1_ESM.pdf [file 41598_2020_61624_MOESM1_ESM.pdf]

# Routine, ensemble characterisation of electrophoretic mobility in high and saturated ionic dispersions

**Jake Austin<sup>1</sup>, Diogo Fernandes<sup>1</sup>, Matthew J A Ruzala<sup>1</sup>, Natalie Hill<sup>1</sup> & Jason Corbett<sup>1</sup>**

<sup>1</sup> Nanotechnology group of Malvern Panalytical Ltd, Grovewood Road, Malvern, WR14 1XZ. Correspondence and requests for materials should be addressed to J.C. (email: [jason.corbett@malvernpanalytical.com](mailto:jason.corbett@malvernpanalytical.com)).

## **Supplementary material 1**

Raw data, statistical outlier analysis and boxplots for Figure 3

## **Supplementary material 2**

Normality tests and Mann-Whitney test for figure 3

## **Supplementary material 3**

Standard operating procedures for the ZS Explorer software for the Zetasizer Ultra (available on request) for KCl, MgCl<sub>2</sub>, NaCl, NaNO<sub>3</sub>. Data for NaAC and NaCO<sub>3</sub> were recorded using the NaCl SOP, but with the sample name changed accordingly.

## **Supplementary material 4**

Frequency to size estimate for figure 2
